# Supplementary material for: Screen time and sleep duration among Brazilian Quilombola schoolchildren
Source: Research Square preprint supplement (doi:10.21203/rs.3.rs-7143085/v1), 2025-08-01
Supplement: Supplementary file 1 [file d8d98207de6cd2f9509e8e9d.docx]

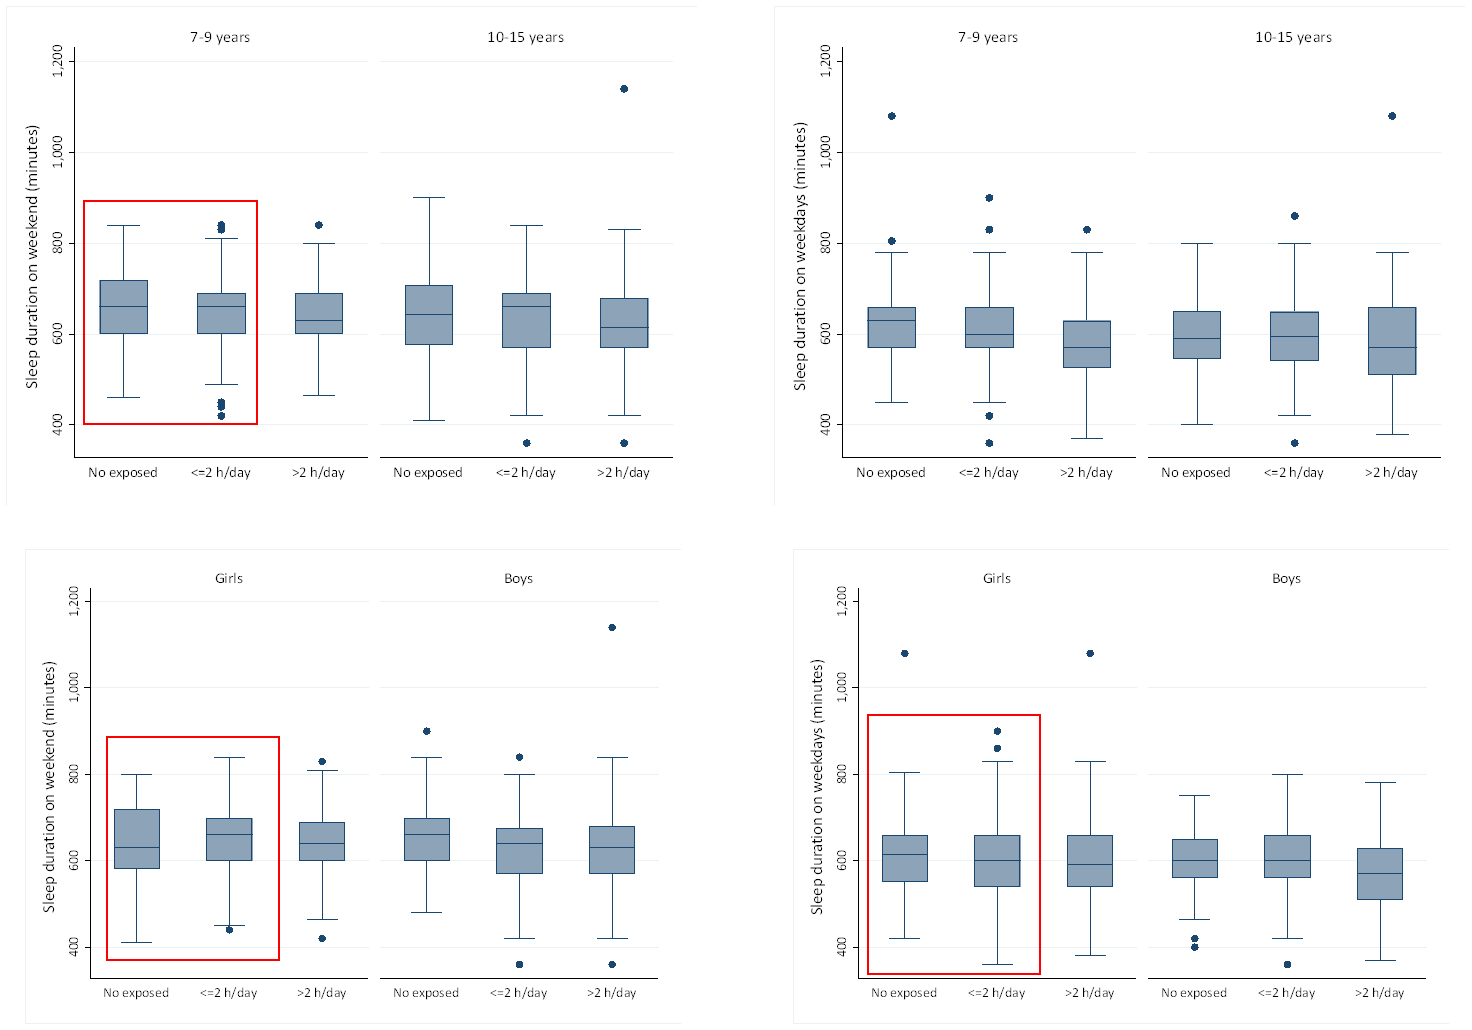


Figure 3 (Suppl.). Graphic representations of associations between screen time exposure and sleep duration on weekdays and weekend, stratified by gender and age range.
